# Supplementary material for: Renal Embolism Associated with the Atrial Myxoma: A Case Report and Literature Review
Source: MDPI journal article supplement (doi:10.3390/medicina60050694), 2024-04-24
Supplement: s1 [file s1]

**Table S1. Details of the search formula used in this review.**

| No. | the search formula                                                                                                                                                                                                                                                                                        |
|-----|-----------------------------------------------------------------------------------------------------------------------------------------------------------------------------------------------------------------------------------------------------------------------------------------------------------|
| 1   | ((("heart"[MeSH Terms] OR "heart"[All Fields] OR "cardiac"[All Fields]) AND ("myxoma"[MeSH Terms] OR "myxoma"[All Fields])) AND (("renal artery"[MeSH Terms] OR ("renal"[All Fields] AND "artery"[All Fields]) OR "renal artery"[All Fields]) AND ("infarction"[MeSH Terms] OR "infarction"[All Fields])) |
| 2   | ((("heart"[MeSH Terms] OR "heart"[All Fields] OR "cardiac"[All Fields]) AND ("myxoma"[MeSH Terms] OR "myxoma"[All Fields])) AND (("renal artery"[MeSH Terms] OR ("renal"[All Fields] AND "artery"[All Fields]) OR "renal artery"[All Fields]) AND ("embolism"[MeSH Terms] OR "embolism"[All Fields]))     |
