# Supplementary material for: Renal Embolism Associated with the Atrial Myxoma: A Case Report and Literature Review
Source: MDPI journal article supplement (doi:10.3390/medicina60050694), 2024-04-24
Supplement: s1 [file s1]

**Table S2: Characteristics of the present and reported cases of patients with a renal infarction associated with a cardiac myxoma.**

| Ref. No. | Authors            | Year | Age | Gender | Initial symptom                              | Myxoma           |                              |
|----------|--------------------|------|-----|--------|----------------------------------------------|------------------|------------------------------|
|          |                    |      |     |        |                                              | Site             | Size, mm                     |
| 22       | Mattle HP et al.   | 1995 | 49  | M      | hemiplegia aphasia                           | left artium      | NA                           |
| 23       | Loche F et al.     | 1999 | 53  | F      | hemiplegia                                   | left artium      | NA                           |
| 24       | Fujisaki K et al.  | 2007 | 24  | M      | right flank pain                             | left artium      | 39 x 49                      |
| 25       | Blackmon SH et al. | 2010 | 23  | M      | right flank pain                             | left artium      | 100 x 90 x 40                |
| 26       | Vogel B et al.     | 2011 | 43  | F      | hemiparesis<br>limb pain                     | left artium      | 10 x 5 x 5                   |
| 27       | Nicholls GM et al. | 2012 | 44  | M      | back pain<br>altered mental state            | left artium      | 55 x 45 x 35                 |
| 28       | Kim H et al.       | 2012 | 58  | F      | right flank pain                             | left artium      | NA                           |
| 29       | Zhang T et al.     | 2012 | 29  | M      | limb pain<br>paresthesia                     | left artium      | 3                            |
| 30       | Huang CY et al.    | 2012 | 56  | M      | paraplegia<br>hypoesthesia                   | left artium      | 75 x 30 x 15                 |
| 31       | Mackie BD et al.   | 2014 | 39  | F      | unresponsive respiratory distress            | left artium      | 20 x 25                      |
| 32       | Min SY et al.      | 2014 | 36  | F      | limb pain altered mental status              | bilateral atrium | 40 x 40 x 30<br>50 x 40 x 30 |
| 33       | Michaud M et al.   | 2015 | 51  | F      | dysesthesia                                  | left artium      | 50 x 48                      |
| 34       | McGowan AR et al.  | 2016 | 21  | F      | seizure                                      | left artium      | NA                           |
| 35       | Ji L et al.        | 2017 | 68  | M      | shortness of breath                          | left artium      | NA                           |
| 36       | Silva MA et al.    | 2018 | 21  | F      | stroke                                       | left artium      | NA                           |
| 37       | Ho KKF et al.      | 2020 | 50  | F      | right leg pain paresthesia                   | left artium      | disappeared                  |
| 38       | Shrestha S et al.  | 2020 | 55  | M      | dizziness headache vomiting gait disturbance | left artium      | 34 x 32                      |
| 39       | Ranjan P et al.    | 2021 | 54  | F      | fever vomiting abdominal pain                | left artium      | 41 x 21                      |
| 40       | Han S et al.       | 2023 | 70  | M      | left flank pain                              | left artium      | 26 x 24 x 22                 |

M, male; F, female; NA, not available

| Ref. No. | Renal infarction                     |            | Serum Cr, mg/dL |      | Dialysis | Other involved arteries                                   | Previous disease               |
|----------|--------------------------------------|------------|-----------------|------|----------|-----------------------------------------------------------|--------------------------------|
|          | Vascular size                        | Laterality | At onset        | Max. |          |                                                           |                                |
| 22       | NA                                   | NA         | NA              | NA   | no       | cerebral, lower limbs                                     | no                             |
| 23       | NA                                   | NA         | NA              | NA   | no       | cerebral, splenic, cutaneous                              | no                             |
| 24       | branch of renal artery               | right      | 0.74            | NA   | no       | no                                                        | no                             |
| 25       | main renal artery                    | right      | NA              | NA   | no       | no                                                        | no                             |
| 26       | main renal artery                    | bilateral  | NA              | NA   | no       | cerebral, coronary, abdominal aorta, splenic, lower limbs | no                             |
| 27       | branch of renal artery               | bilateral  | NA              | NA   | no       | carotid, abdominal aorta, splenic, lower limbs            | no                             |
| 28       | branch of renal artery               | bilateral  | NA              | NA   | no       | cerebral, coronary aneurysms                              | stroke                         |
| 29       | abdominal aorta                      | bilateral  | NA              | NA   | yes      | abdominal aorta, splenic, lower limbs                     | no                             |
| 30       | abdominal aorta                      | bilateral  | 1.99            | 2.16 | yes      | abdominal aorta                                           | no                             |
| 31       | main renal artery                    | bilateral  | NA              | NA   | no       | cerebral, coronary, common iliac                          | no                             |
| 32       | branch of renal artery               | bilateral  | NA              | NA   | no       | cerebral, splenic, common iliac, lower limbs              | no                             |
| 33       | branch of renal artery               | bilateral  | NA              | NA   | no       | cerebral, splenic, upper and lower limbs                  | HT, osteopenia                 |
| 34       | abdominal aorta<br>main renal artery | left       | NA              | NA   | yes      | cerebral, abdominal aorta, SMA, lower limbs               | no                             |
| 35       | branch of renal artery               | left       | 1.79            | 8.81 | no       | no                                                        | IHD, CHF, Af, Rt renal atrophy |
| 36       | main renal artery                    | left       | 1.06            | 3.04 | yes      | cerebral, SMA, lower limbs                                | no                             |
| 37       | branch of renal artery               | bilateral  | NA              | NA   | no       | bilateral lower limbs                                     | no                             |
| 38       | branch of renal artery               | bilateral  | NA              | NA   | no       | cerebral, splenic                                         | no                             |
| 39       | branch of renal artery               | left       | NA              | NA   | no       | no                                                        | HT, DM, IHD, IDA, hypothyroid  |
| 40       | main renal artery                    | left       | 1.4             | NA   | no       | no                                                        | HT, HL, CHF, IHD, kidney stone |

Cr, creatinine; NA, not available; SMA, superior mesentric artery; HT, hypertension; IHD, ischemic heart disease; CHF, congestive heart failure; Af, atrial fibrillation; DM, diabetes melitus; IDA, iron defeciency anemia; HL, hyperlipidemia.

| Ref.<br>No. | Treatments                      |              |                    | Outcome  |                |
|-------------|---------------------------------|--------------|--------------------|----------|----------------|
|             | Embolectomy                     | Thrombolysis | Anticoagulant      | Survival | Renal survival |
| 22          | no                              | no           | no                 | alive    | -              |
| 23          | no                              | no           | no                 | alive    | -              |
| 24          | no                              | no           | heparin            | alive    | -              |
| 25          | no                              | no           | no                 | alive    | nephrectomy    |
| 26          | yes (aorta, Rt renal, iliac)    | urokinase    | heparin            | alive    | -              |
| 27          | yes (iliac)                     | no           | heparin            | alive    | -              |
| 28          | no                              | no           | no                 | alive    | -              |
| 29          | yes (femoral)                   | urokinase    | no                 | alive    | improved       |
| 30          | yes (aorta)                     | no           | no                 | died     | died           |
| 31          | yes (coronary)                  | tPA          | NA                 | died     | died           |
| 32          | yes (common iliac, limb)        | NA           | NA                 | alive    | improved       |
| 33          | no                              | no           | no                 | alive    | -              |
| 34          | yes (MCA, aorta, femoral)       | no           | heparin            | alive    | improved       |
| 35          | no                              | no           | heparin + warfarin | alive    | improved       |
| 36          | yes (MCA, renal, femoral, etc.) | tPA          | NA                 | alive    | improved       |
| 37          | yes (popliteal)                 | no           | heparin            | alive    | -              |
| 38          | no                              | no           | heparin            | alive    | -              |
| 39          | no                              | no           | heparin            | alive    | -              |
| 40          | no                              | no           | heparin            | alive    | improved       |

NA, not available; MCA, middle cerebral artery; tPA, tissue plasminogen activator
