# Supplementary figures and images for: Renal Embolism Associated with the Atrial Myxoma: A Case Report and Literature Review
Source: MDPI journal article supplement (doi:10.3390/medicina60050694), 2024-04-24

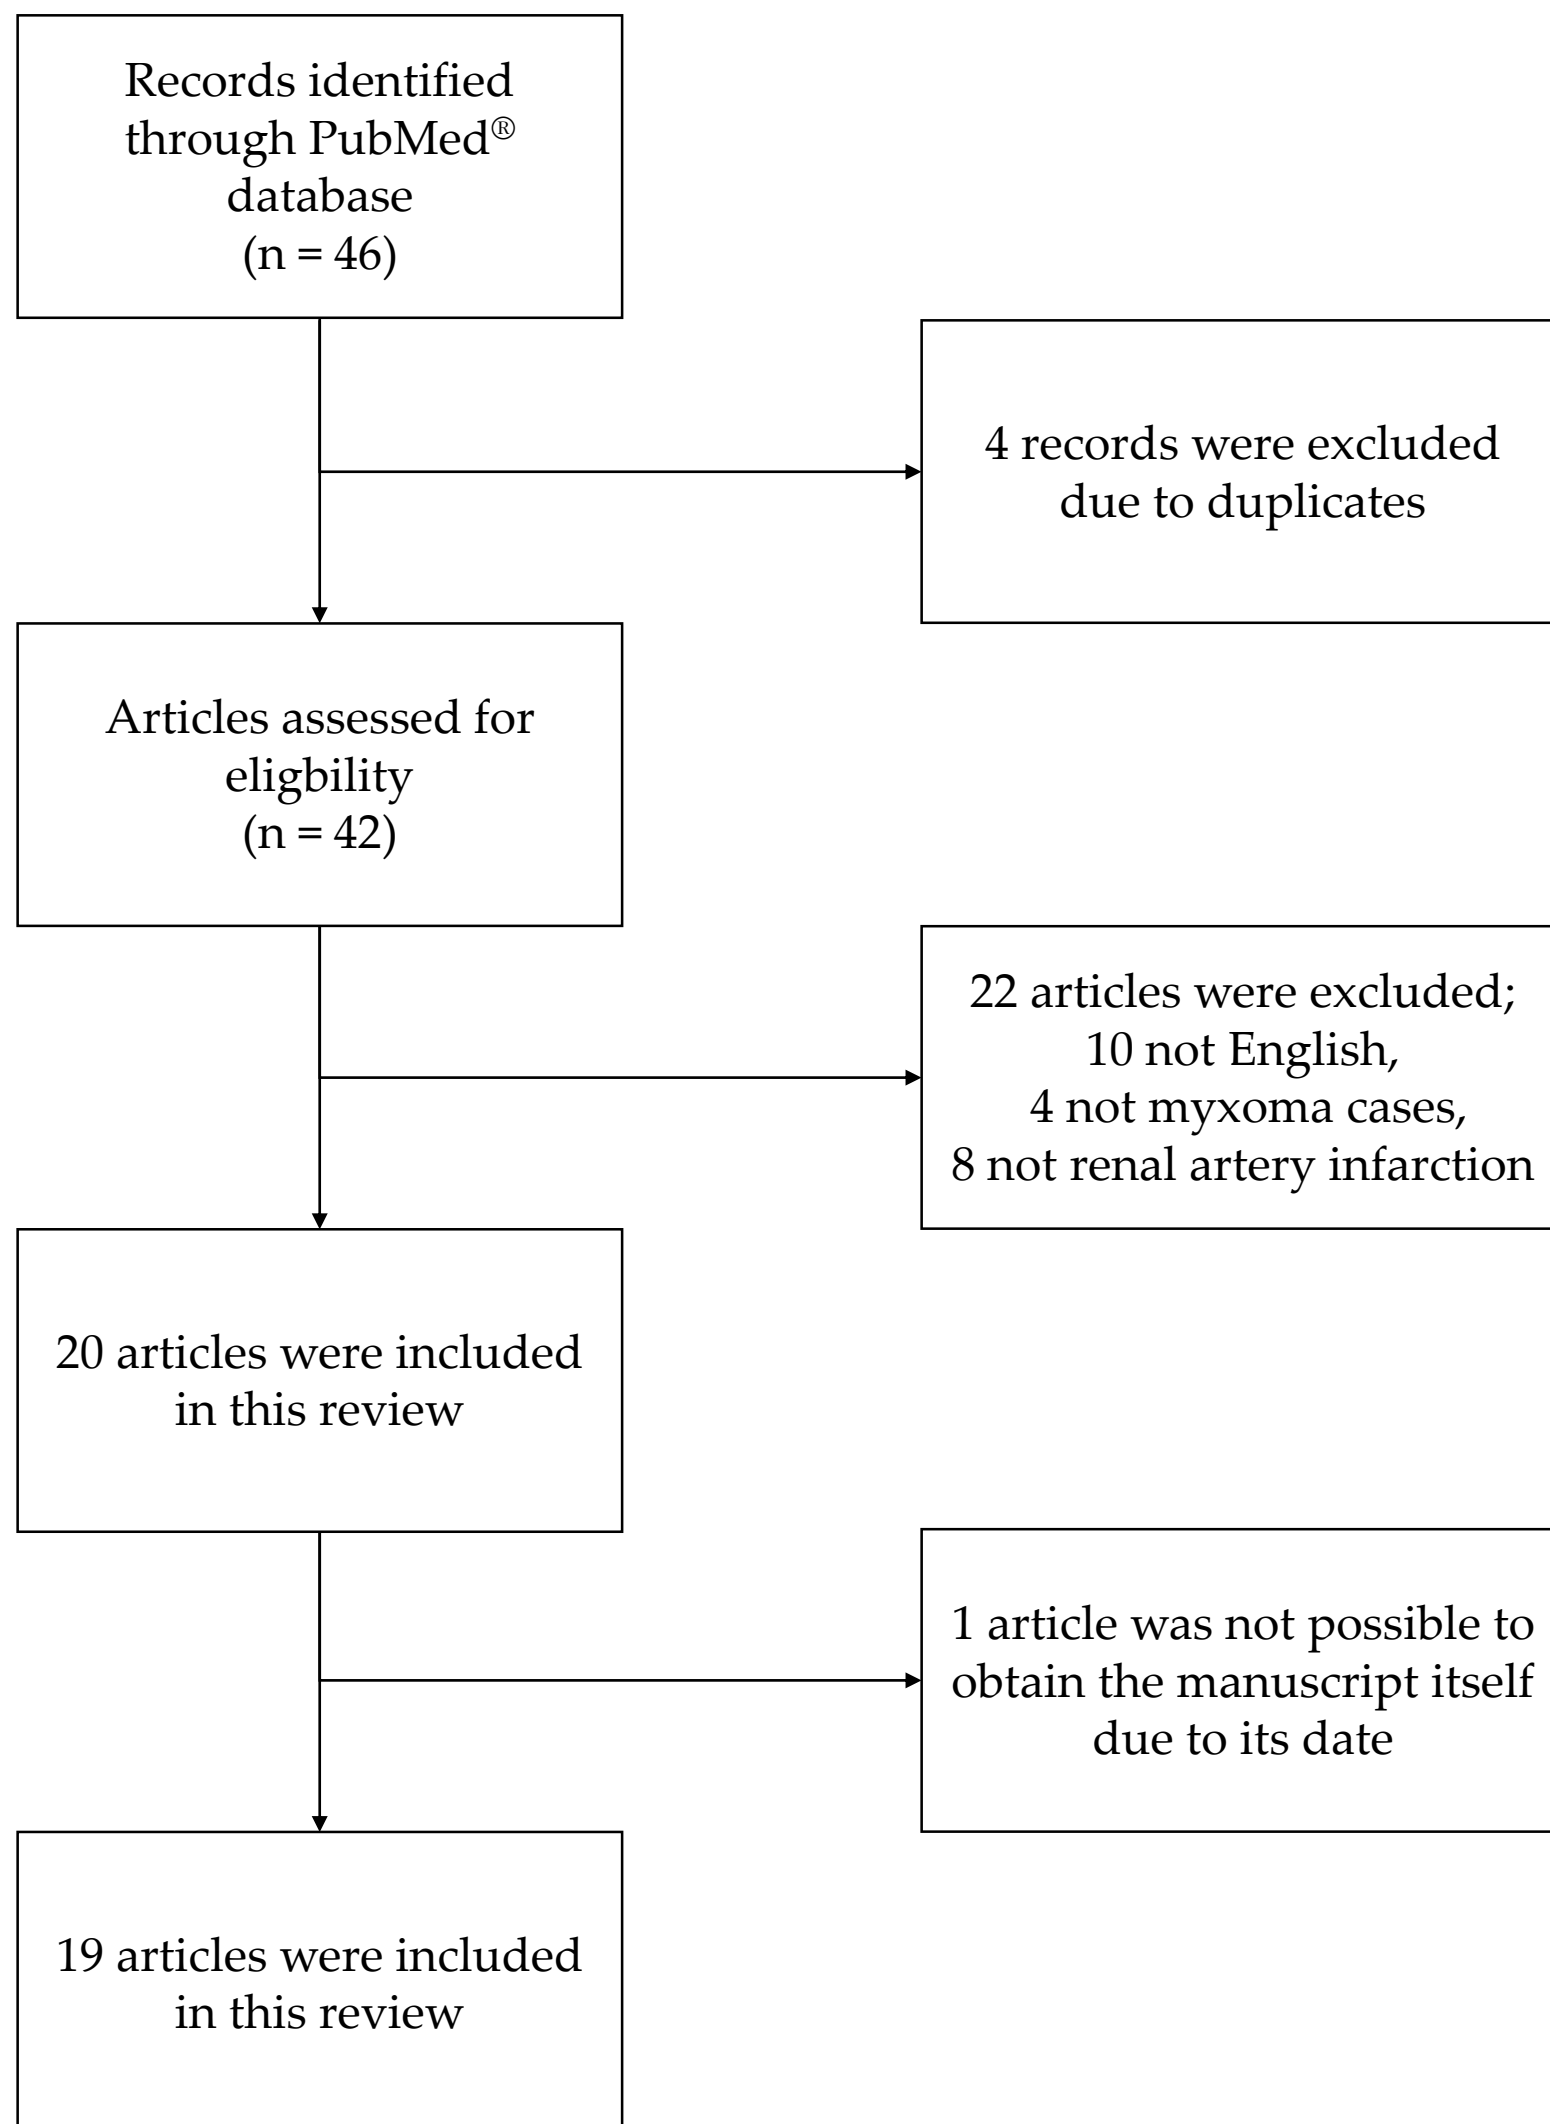

**Figure S1: The flowchart of the screening process in this literature review.**

Supplement: s1 [file s1]
